# Supplementary material
Source: publisher figshare collection journal article supplement (https://acs.figshare.com/ndownloader/files/13990658)
Supplement: Supplementary file 1 [file 13990658]

# **The use of Carbohydrate Binding Modules (CBMs) to elucidate the relationship between fibrillation, hydrolyzability, and accessibility of cellulosic substrates**

Kevin Aïssa\*, Vera Novy\*, Fredrik Nielsen, and Jack Saddler\*\*

Forest Products Biotechnology and Bioenergy Group, Department of Wood Science, Faculty of Forestry, The University of British Columbia, 2424 Main Mall, Vancouver, BC, Canada

## **Table of content:**

S1: Time course of enzymatic hydrolysis reactions of MFC0 (0 kWh ton<sup>-1</sup>, circles), MFC2 (500 kWh ton<sup>-1</sup>, squares), MFC4 (1000 kWh ton<sup>-1</sup>, triangles), and MFC6 (1500 kWh ton<sup>-1</sup>, diamonds).

S2: Adsorption of CBM2a on increasingly refined substrates **b)** Adsorption of CBM17 on increasingly refined substrates

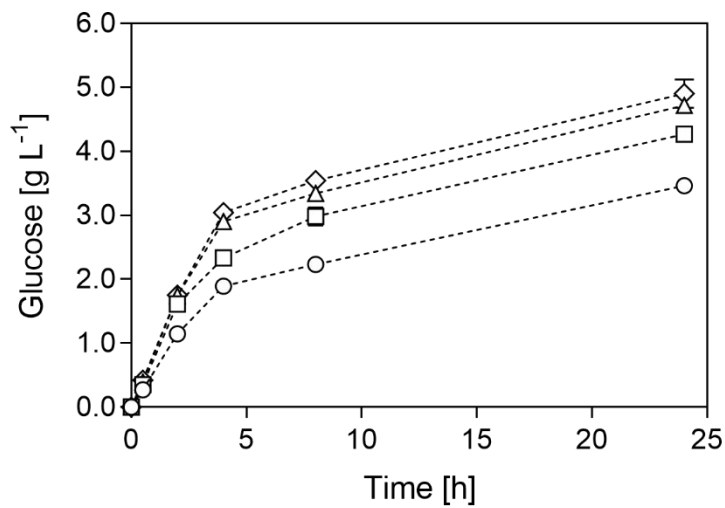

**Supplementary Figure S1:** Time course of enzymatic hydrolysis reactions of MFC0 (0 kWh ton<sup>-1</sup>, circles), MFC2 (500 kWh ton<sup>-1</sup>, squares), MFC4 (1000 kWh ton<sup>-1</sup>, triangles), and MFC6 (1500 kWh ton<sup>-1</sup>, diamonds). All hydrolysis reactions were performed with a substrate and enzyme loading of 10 g dry mass substrate per L and 5 FPU per g dry mass substrate, respectively. Data represent mean values of 2 independent experiments. Error bars show the spread.

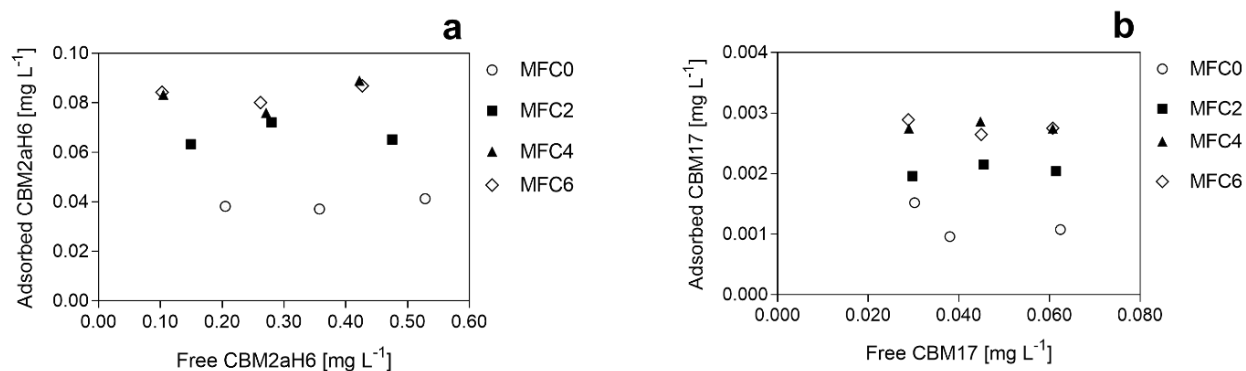

**Supplementary Figure S2: a) Adsorption of CBM2a on increasingly refined substrates b)**

Adsorption of CBM17 on increasingly refined substrates: MFC0 (0 kWh ton<sup>-1</sup>, circles), MFC2 (500 kWh ton<sup>-1</sup>, squares, MFC4 (1000 kWh ton<sup>-1</sup>, triangles), and MFC6 (1500 kWh ton<sup>-1</sup>, diamonds). CBM2a binding indicates accessible crystalline cellulose. CBM17 binding indicates accessible paracrystalline cellulose.
